# Supplementary material
Source: publisher site journal article supplement (https://www.dovepress.com/article/338095)
Supplement: Supplementary file 1 [file get_supplementary_file.php]

**Supporting Table S1** Prevalence of insomnia symptoms according to gender, age, and disaster area in 2009-2012

|  |  | Difficulty initiating sleep [DIS] | | | | | |
| --- | --- | --- | --- | --- | --- | --- | --- |
|  |  | 2009 | | 2011 | | 2012 | |
|  |  | N ( ％ ) | *95% CI* | n ( ％ ) | *95% CI* | n ( ％ ) | *95% CI* |
| All |  | 384 ( 31.4 ) | 29.3-33.6 | 516 ( 41.2 )x | 38.9-43.5 | 377 ( 29.4 ) | 27.4-31.6 |
| Gender |  |  |  |  |  |  |  |
|  | Men | 124 ( 23.1 ) | 20.2-26.2 | 211 ( 36.8 )x | 33.6-40.2 | 151 ( 26.4 ) | 23.4-29.5 |
|  | Women | 260 ( 38.0 )a | 35.0-41.1 | 305 ( 44.8 )ax | 41.7-47.9 | 226 ( 31.9 ) | 29.1-34.9 |
| Age group | |  |  |  |  |  |  |
|  | 20~64 | 272 ( 29.9 ) | 27.5-32.5 | 154 ( 42.8 )x | 38.4-47.2 | 235 ( 26.4 ) | 24.1-28.9 |
|  | ≧65 | 112 ( 35.7 ) | 31.4-40.2 | 362 ( 40.5 ) | 37.8-43.2 | 142 ( 36.2 )b | 32.3-40.3 |
| Education | |  |  |  |  |  |  |
|  | Less than high school | 74 ( 46.8 )c | 40.4-53.4 | 64 ( 41.3 ) | 35.0-47.9 | 50 ( 35.7 ) | 29.4-42.6 |
|  | High school | 199 ( 30.1 ) | 27.3-33.1 | 279 ( 43.1 )x | 39.9-46.3 | 194 ( 29.8 ) | 26.9-32.8 |
|  | Junior college or higher | 111 ( 27.5 ) | 24.0-31.3 | 173 ( 38.4 )x | 34.7-42.2 | 133 ( 27.1 ) | 24.0-30.6 |
| Job groups | |  |  |  |  |  |  |
|  | Unemployed | 215 ( 38.3 )d | 35.0-41.8 | 264 ( 46.1 )dx | 42.7-49.5 | 218 ( 36.0 )d | 32.8-39.2 |
|  | Employed | 169 ( 25.5 ) | 22.8-28.4 | 252 ( 37.0 )x | 34.0-40.1 | 159 ( 23.6 ) | 21.0-26.4 |
| Disaster area | |  |  |  |  |  |  |
|  | Central area | 38 ( 26.4 ) | 20.8-32.8 | 61 ( 40.1 )x | 33.8-46.8 | 43 ( 31.6 ) | 25.5-38.5 |
|  | Outer area | 145 ( 34.6 ) | 30.9-38.5 | 178 ( 39.5 ) | 35.6-43.3 | 142 ( 29.1 ) | 25.8-32.6 |
|  | Other area | 201 ( 30.5 ) | 27.6-33.5 | 277 ( 42.6 )x | 39.4-45.8 | 192 ( 29.2 ) | 26.4-32.2 |
|  |  | Difficulty maintaining sleep [DMS] | | | | | |
|  |  | 2009 | | 2011 | | 2012 | |
|  |  | n ( ％ ) | *p* | n ( ％ ) | *p* | n ( ％ ) | *p* |
| All |  | 304 ( 24.9 ) | 22.9-26.9 | 406 ( 32.4 )x | 30.2-34.6 | 303 ( 23.7 ) | 21.8-25.7 |
| Gender |  |  |  |  |  |  |  |
|  | Men | 120 ( 22.3 ) | 19.5-25.4 | 168 ( 29.3 )x | 26.3-32.5 | 111 ( 19.4 ) | 16.8-22.2 |
|  | Women | 184 ( 26.9 ) | 24.2-29.7 | 238 ( 35.0 )x | 32.0-38.0 | 192 ( 27.1 )a | 24.5-30.0 |
| Age group | |  |  |  |  |  |  |
|  | 20~64 | 204 ( 22.4 ) | 20.3-24.8 | 265 ( 29.6 )x | 27.2-32.2 | 177 ( 19.9 ) | 17.8-22.2 |
|  | ≧65 | 100 ( 31.9 )b | 27.7-36.3 | 141 ( 39.2 )b | 35.0-43.5 | 126 ( 32.1 )b | 28.4-36.4 |
| Education | |  |  |  |  |  |  |
|  | Less than high school | 56 ( 35.4 )c | 29.5-41.9 | 59 ( 38.1 ) | 31.9-44.6 | 42 ( 30.0 ) | 24.1-36.7 |
|  | High school | 168 ( 25.4 ) | 22.7-28.3 | 217 ( 33.5 )x | 30.5-36.6 | 162 ( 24.9 ) | 22.2-27.8 |
|  | Junior college or higher | 80 ( 19.8 ) | 16.7-23.3 | 130 ( 28.8 )x | 25.5-32.5 | 99 ( 20.2 ) | 17.4-23.4 |
| Job groups | |  |  |  |  |  |  |
|  | Unemployed | 167 ( 29.8 ) | 26.7-33.0 | 218 ( 38.1 )x | 34.8-41.4 | 182 ( 30.0 ) | 27.1-33.2 |
|  | Employed | 137 ( 20.7 ) | 18.2-23.4 | 188 ( 27.6 )x | 24.9-30.5 | 121 ( 17.9 ) | 15.6-20.5 |
| Disaster area | |  |  |  |  |  |  |
|  | Central area | 26 ( 18.1 ) | 13.4-23.9 | 50 ( 32.9 )x | 27.0-39.4 | 39 ( 28.7 ) | 22.8-35.4 |
|  | Outer area | 116 ( 27.7 ) | 24.2-31.4 | 146 ( 32.4 ) | 28.9-36.1 | 106 ( 21.7 ) | 18.8-25.0 |
|  | Other area | 162 ( 24.6 ) | 21.9-27.4 | 210 ( 32.3 )x | 29.3-35.3 | 158 ( 24.1 ) | 21.4-26.9 |
|  |  | Early morning awakening [EMA] | | | | | |
|  |  | 2009 | | 2011 | | 2012 | |
|  |  | n ( ％ ) | *p* | n ( ％ ) | *p* | n ( ％ ) | *p* |
| All |  | 266 ( 21.8 ) | 19.9-23.8 | 381 ( 30.4 )x | 28.3-32.6 | 272 ( 21.2 ) | 19.4-23.2 |
| Gender |  |  |  |  |  |  |  |
|  | Men | 107 ( 19.9 ) | 17.2-22.9 | 161 ( 28.1 )x | 25.1-31.3 | 109 ( 19.0 ) | 16.5-21.9 |
|  | Women | 159 ( 23.2 ) | 20.7-26.0 | 220 ( 32.3 )x | 29.4-35.3 | 163 ( 23.0 ) | 20.5-25.7 |
| Age group | |  |  |  |  |  |  |
|  | 20~64 | 174 ( 19.1 ) | 17.1-21.4 | 252 ( 28.2 )x | 25.8-30.7 | 159 ( 17.9 ) | 15.9-20.1 |
|  | ≧65 | 92 ( 29.3 )b | 25.3-33.7 | 129 ( 35.8 )b | 31.8-40.1 | 113 ( 28.8 )b | 25.2-32.7 |
| Education | |  |  |  |  |  |  |
|  | Less than high school | 50 ( 31.7 )c | 25.9-38.0 | 59 ( 38.1 ) | 31.9-44.6 | 30 ( 21.4 ) | 16.3-27.7 |
|  | High school | 144 ( 21.8 ) | 19.3-24.5 | 203 ( 31.3 ) | 28.4-34.4 | 139 ( 21.4 ) | 18.8-24.1 |
|  | Junior college or higher | 72 ( 17.8 ) | 14.9-21.2 | 119 ( 26.4 ) | 23.1-29.9 | 103 ( 21.0 ) | 18.2-24.2 |
| Job groups | |  |  |  |  |  |  |
|  | Unemployed | 152 ( 27.1 )d | 24.1-30.3 | 201 ( 35.1 )dx | 31.9-38.4 | 159 ( 26.2 )d | 23.4-29.3 |
|  | Employed | 114 ( 17.2 ) | 14.9-19.8 | 180 ( 26.4 )x | 23.8-29.3 | 113 ( 16.7 ) | 14.5-19.2 |
| Disaster area | |  |  |  |  |  |  |
|  | Central area | 22 ( 15.3 ) | 11.0-20.9 | 49 ( 32.2 )x | 26.4-38.7 | 35 ( 25.7 ) | 20.1-32.4 |
|  | Outer area | 94 ( 22.4 ) | 19.3-26.0 | 137 ( 30.4 )x | 26.9-34.1 | 91 ( 18.7 ) | 15.9-21.7 |
|  | Other area | 150 ( 22.7 ) | 20.2-25.5 | 195 ( 30.0 )x | 27.1-33.0 | 146 ( 22.2 ) | 19.7-25.0 |
|  |  | Deteriorated sleep quality [DSQ] | | | | | |
|  |  | 2009 | | 2011 | | 2012 | |
|  |  | n ( ％ ) | *p* | n ( ％ ) | *p* | n ( ％ ) | *p* |
| All |  | 192 ( 15.7 ) | 13.7-17.9 | 283 ( 22.6 )x | 20.7-24.6 | 211 ( 16.5 ) | 14.8-18.3 |
| Gender |  |  |  |  |  |  |  |
|  | Men | 68 ( 12.6 ) | 10.0-15.7 | 112 ( 20.0 )x | 17.0-22.4 | 90 ( 15.7 ) | 13.4-18.4 |
|  | Women | 124 ( 18.1 ) | 15.3-21.2 | 171 ( 25.1 )ax | 22.5-27.9 | 121 ( 17.1 ) | 14.9-19.5 |
| Age group | |  |  |  |  |  |  |
|  | 20~64 | 150 ( 16.5 ) | 14.1-19.1 | 209 ( 23.4 )x | 21.1-25.8 | 157 ( 17.7 ) | 15.7-19.9 |
|  | ≧65 | 42 ( 13.4 ) | 9.8-17.6 | 74 ( 20.6 ) | 17.3-24.3 | 54 ( 13.8 ) | 11.2-16.9 |
| Education | |  |  |  |  |  |  |
|  | Less than high school | 34 ( 21.5 ) | 15.4-28.8 | 39 ( 25.2 ) | 19.9-31.3 | 24 ( 17.1 ) | 12.5-23.0 |
|  | High school | 102 ( 15.4 ) | 12.8-18.4 | 137 ( 21.1 )x | 18.6-23.9 | 105 ( 16.1 ) | 13.9-18.6 |
|  | Junior college or higher | 56 ( 13.9 ) | 10.6-17.6 | 107 ( 23.7 )x | 20.6-27.2 | 82 ( 16.7 ) | 14.1-19.7 |
| Job groups | |  |  |  |  |  |  |
|  | Unemployed | 96 ( 14.5 ) | 14.1-20.5 | 144 ( 25.1 )x | 22.3-28.2 | 99 ( 16.3 ) | 14.0-19.0 |
|  | Employed | 96 (17.1 ) | 11.9-17.4 | 139 ( 20.4 )x | 18.0-23.1 | 112 ( 16.6 ) | 14.4-19.1 |
| Disaster area | |  |  |  |  |  |  |
|  | Central area | 17 ( 11.8 ) | 7.0-18.2 | 43 ( 28.3 )x | 22.7-34.7 | 30 ( 22.1 ) | 16.8-28.5 |
|  | Outer area | 70 ( 16.7 ) | 13.3-20.6 | 106 ( 23.5 ) | 20.4-26.9 | 83 ( 17.0 ) | 14.4-20.0 |
|  | Other area | 105 ( 15.9 ) | 13.2-18.9 | 134 ( 20.6 ) | 18.1-23.3 | 98 ( 14.9 ) | 12.8-17.4 |

**Notes:**

CI=confidence interval, x: p<0.05 vs. 2009, a: p<0.05 vs. men, b: p<0.05 vs. 20~64years, c: p<0.05 vs. other education, d: p<0.05 vs. employed

**Supporting Table S2** Risk of insomnia: Logistic regression analyses

|  |  | 2009 | | | | | | | |
| --- | --- | --- | --- | --- | --- | --- | --- | --- | --- |
|  |  | Insomnia (+) | | Insomnia (-) | |  |  |  |
|  |  | n | % | n | % | Crude OR | Adjusted OR | 95% CI |
| **Gender** |  |  |  |  |  |  |  |  |
| Men |  | 47 | 32.9 | 490 | 45.5 | 1.00 | 1.00 | - |
| Women |  | 96 | 67.1 | 587 | 54.5 | 1.70 | 1.48 | 1.00–2.19 |
| **Age** |  |  |  |  |  |  |  |  |
| 20–64 |  | 104 | 72.7 | 802 | 74.5 | 0.91 | 1.26 | 0.78–2.06 |
| ≥65 |  | 39 | 27.3 | 275 | 25.5 | 1.00 | 1.00 | - |
| **Education** |  |  |  |  |  |  |  |  |
| Below high school |  | 24 | 16.8 | 134 | 12.4 | 1.30 | 1.17 | 0.64–2.15 |
| High school |  | 70 | 49.0 | 589 | 54.7 | 0.86 | 0.84 | 0.56–1.25 |
| Junior college or higher |  | 49 | 34.3 | 354 | 32.9 | 1.00 | 1.00 | - |
| **Job groups** |  |  |  |  |  |  |  |  |
| Unemployed |  | 59 | 41.3 | 601 | 55.8 | 1.8 | 1.00 | - |
| Employed |  | 84 | 58.7 | 476 | 44.2 | 1.00 | 1.74 | 1.15–2.62 |
| **Disaster area** |  |  |  |  |  |  |  |  |
| Central |  | 14 | 9.8 | 130 | 12.1 | 0.83 | 0.75 | 0.41–1.38 |
| Outer |  | 53 | 37.1 | 366 | 34.0 | 1.11 | 1.06 | 0.73–1.55 |
| Other |  | 76 | 53.1 | 581 | 53.9 | 1.00 | 1.00 | - |
|  |  | 2011 | | | | | | | |
|  |  | Insomnia (+) | | Insomnia (-) | |  |  |  |
|  |  | n | % | n | % | Crude OR | Adjusted OR | 95% CI |
| **Gender** |  |  |  |  |  |  |  |  |
| Men |  | 109 | 41.0 | 464 | 47.0 | 1.00 | 1.00 | - |
| Women |  | 157 | 59.0 | 524 | 53.0 | 1.28 | 1.24 | 0.92–1.66 |
| **Age** |  |  |  |  |  |  |  |  |
| 20–64 |  | 205 | 77.1 | 689 | 69.7 | 1.46 | 1.64 | 1.12–2.42 |
| ≥65 |  | 61 | 22.9 | 299 | 30.3 | 1.00 | 1.00 | - |
| **Education** |  |  |  |  |  |  |  |  |
| Below high school |  | 34 | 12.8 | 121 | 12.2 | 0.95 | 1.20 | 0.73–1.96 |
| High school |  | 129 | 48.5 | 519 | 52.5 | 0.84 | 0.89 | 0.66–1.20 |
| Junior college or higher |  | 103 | 38.7 | 348 | 35.2 | 1.00 | 1.00 | - |
| **Job groups** |  |  |  |  |  |  |  |  |
| Unemployed |  | 143 | 53.8 | 538 | 54.5 | 1.03 | 1.00 | - |
| Employed |  | 123 | 46.2 | 450 | 45.5 | 1.00 | 1.13 | 0.82–1.57 |
| **Disaster area** |  |  |  |  |  |  |  |  |
| Central |  | 39 | 14.7 | 113 | 11.4 | 1.40 | 1.44 | 0.95–2.19 |
| Outer |  | 98 | 36.8 | 353 | 35.7 | 1.12 | 1.10 | 0.81–1.48 |
| Other |  | 129 | 48.5 | 522 | 52.8 | 1.00 | 1.00 | - |
|  |  | 2012 | | | | | | | |
|  |  | Insomnia (+) | | Insomnia (-) | |  |  |  |
|  |  | n | % | n | % | Crude OR | Adjusted OR | 95% CI |
| **Gender** |  |  |  |  |  |  |  |  |
| Men |  | 57 | 41.9 | 516 | 45.1 | 1.00 | 1.00 | - |
| Women |  | 79 | 58.1 | 629 | 54.9 | 1.14 | 1.08 | 0.74–1.59 |
| **Age** |  |  |  |  |  |  |  |  |
| 20–64 |  | 110 | 80.9 | 779 | 68.0 | 1.99 | 2.50 | 1.47–4.23 |
| ≥65 |  | 26 | 19.1 | 366 | 32.0 | 1.00 | 1.00 | - |
| **Education** |  |  |  |  |  |  |  |  |
| Below high school |  | 14 | 10.3 | 126 | 11.0 | 0.86 | 1.30 | 0.65–2.59 |
| High school |  | 66 | 48.5 | 585 | 51.1 | 0.87 | 0.97 | 0.66–1.43 |
| Junior college or higher |  | 56 | 41.2 | 434 | 37.9 | 1.00 | 1.00 | - |
| **Job groups** |  |  |  |  |  |  |  |  |
| Unemployed |  | 72 | 52.9 | 603 | 52.7 | 0.99 | 1.00 | - |
| Employed |  | 64 | 47.1 | 542 | 47.3 | 1.00 | 1.30 | 0.86–1.97 |
| **Disaster area** |  |  |  |  |  |  |  |  |
| Central |  | 19 | 14.0 | 117 | 10.2 | 1.43 | 1.51 | 0.87–2.63 |
| Outer |  | 50 | 36.8 | 438 | 38.3 | 1.01 | 0.98 | 0.66–1.45 |
| Other |  | 67 | 49.3 | 590 | 51.5 | 1.00 | 1.00 | - |

**Notes:**

OR=odds ratio,9 5％ CI=95％ confidence interval
